# Supplementary material for: Cold plasma synthesis of phosphorus-doped CoFe2O4 with oxygen vacancies for enhanced OER activity
Source: Royal Society of Chemistry journal article supplement (doi:10.1039/d3cp02979d), 2023-01-01
Supplement: d3cp02979d1.pdf [file d3cp02979d1.pdf]

# Supporting Information

## **Cold Plasma Synthesis of Phosphorus-doped $\text{CoFe}_2\text{O}_4$ with Oxygen Vacancies for Enhanced OER Activity**

Dapeng Meng<sup>†, [a]</sup> Xiangfeng Peng<sup>†, [a]</sup> Jingxuan Zheng,<sup>[a]</sup> Zhao Wang<sup>\*[a]</sup>

<sup>a</sup>National Engineering Research Center of Industry Crystallization Technology, School of Chemical Engineering and Technology, Tianjin University

<sup>†</sup> These authors contributed equally to this work.

\* Corresponding author

E-mail: [wangzhao@tju.edu.cn](mailto:wangzhao@tju.edu.cn)

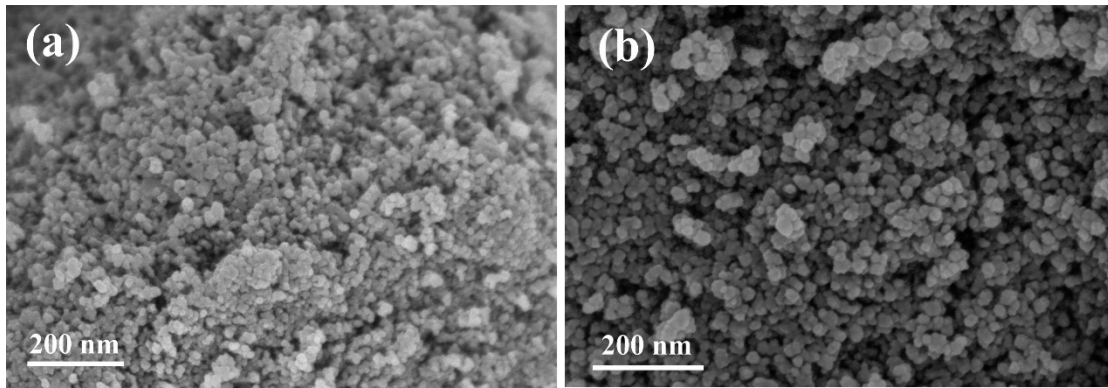

Fig. S1 SEM images of samples (a) CoFe<sub>2</sub>O<sub>4</sub>, (b) CoFe<sub>2</sub>O<sub>4</sub>-V<sub>o</sub>

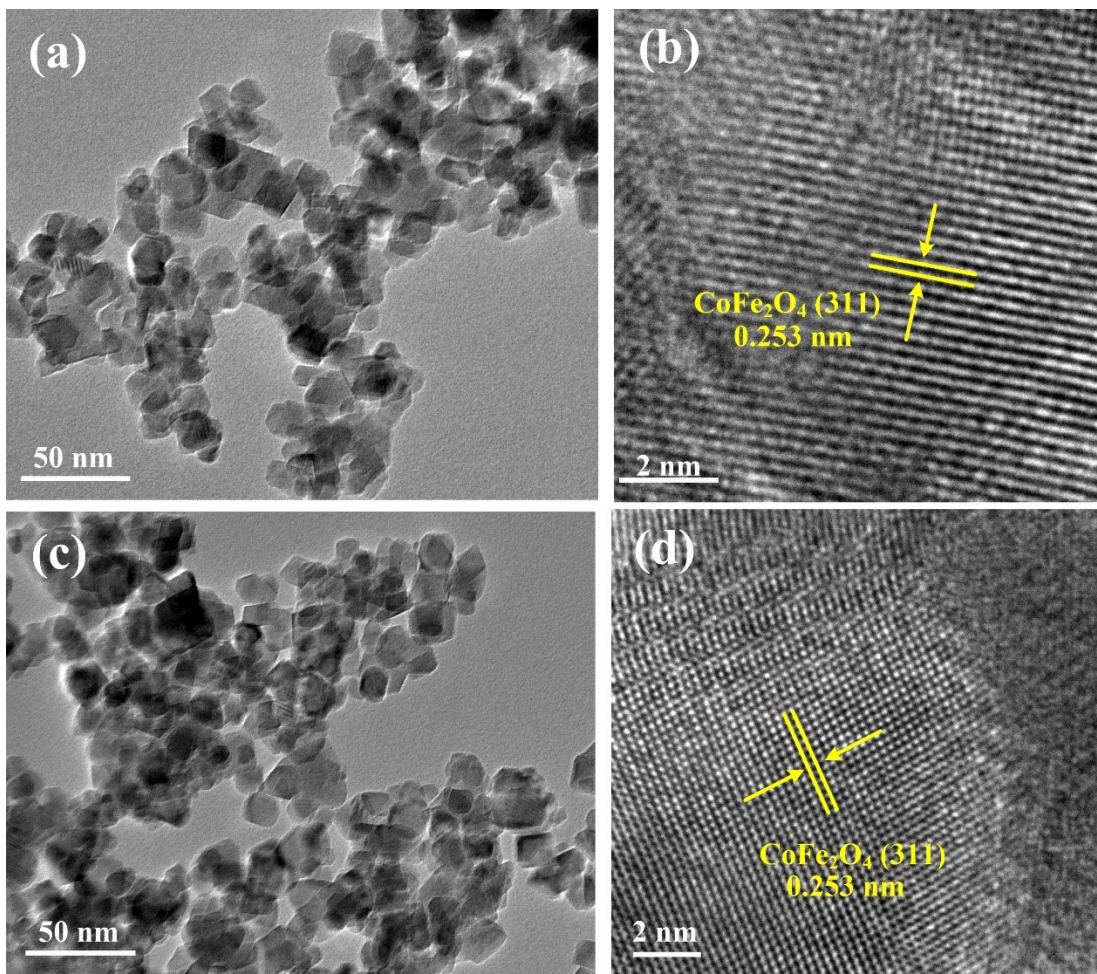

Fig. S2 TEM and SEM images of the samples. (a, b)CoFe<sub>2</sub>O<sub>4</sub>, (c, d)CoFe<sub>2</sub>O<sub>4</sub>-V<sub>o</sub>.

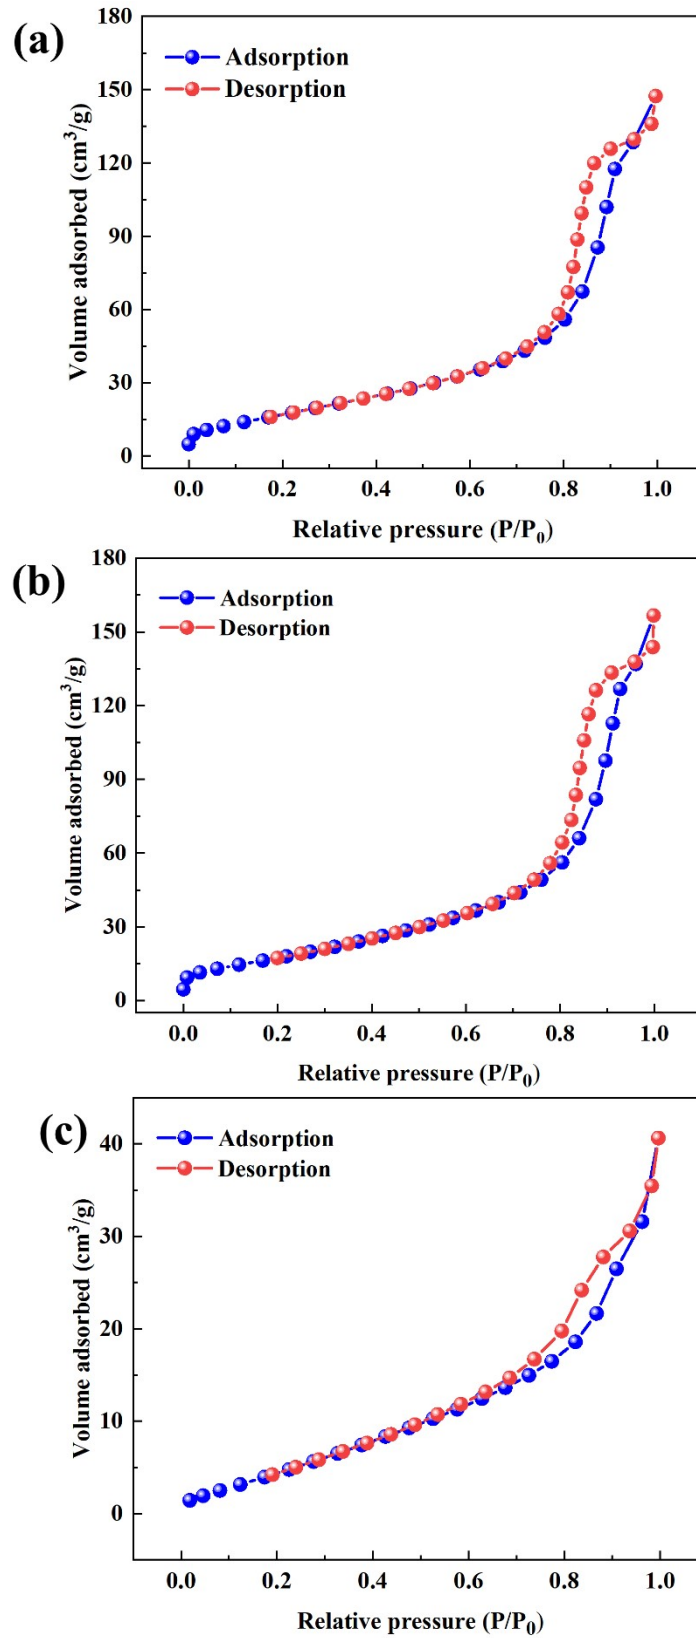

Fig. S3  $N_2$ -adsorption/desorption isotherms of (a)  $CoFe_2O_4$ , (b)  $CoFe_2O_4-V_O$  and (c)  $CoFe_2O_4-P$ .

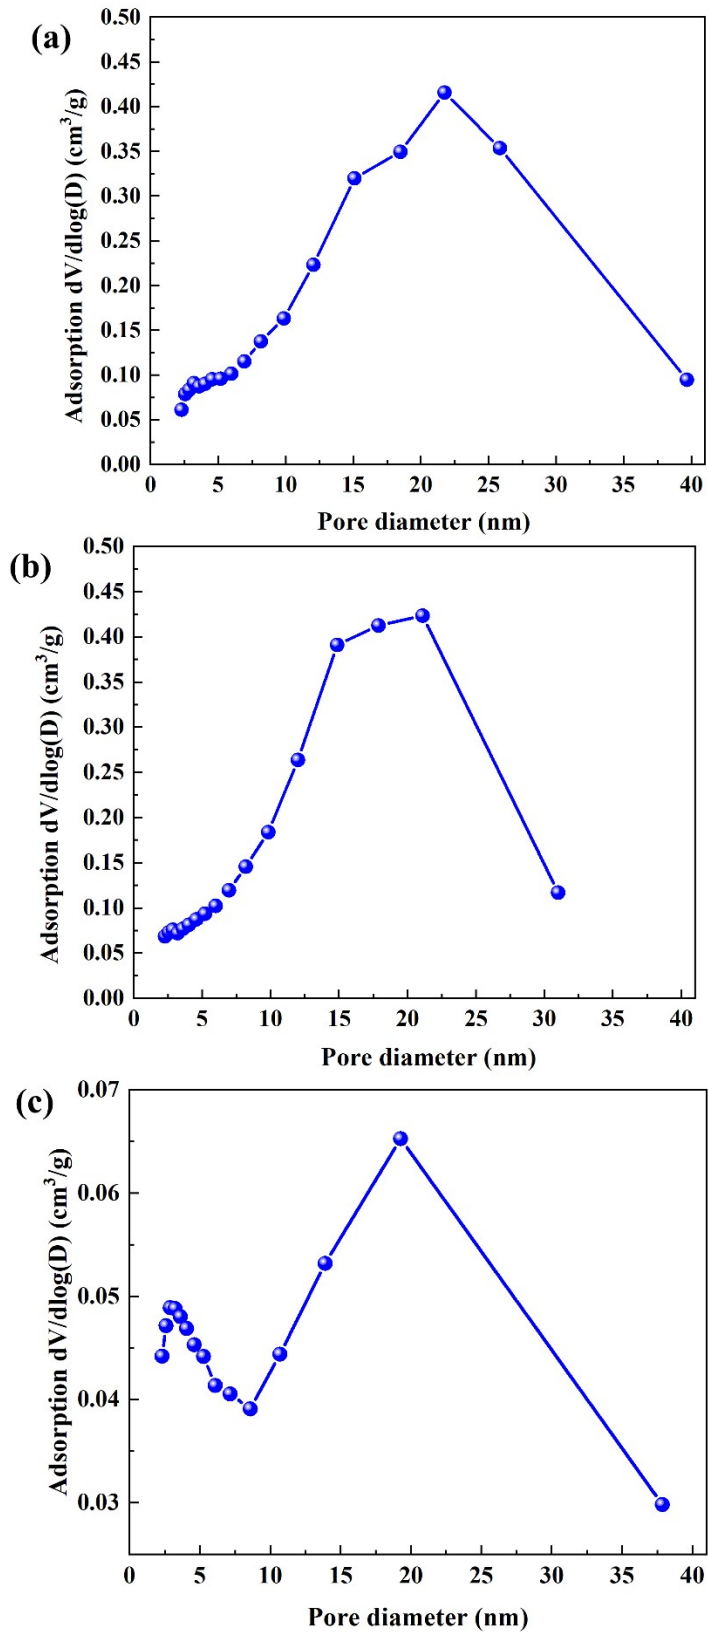

Fig. S4 Pore size distributions of (a)  $\text{CoFe}_2\text{O}_4$ , (b)  $\text{CoFe}_2\text{O}_4\text{-V}_\text{O}$  and (c)  $\text{CoFe}_2\text{O}_4\text{-P}$ .

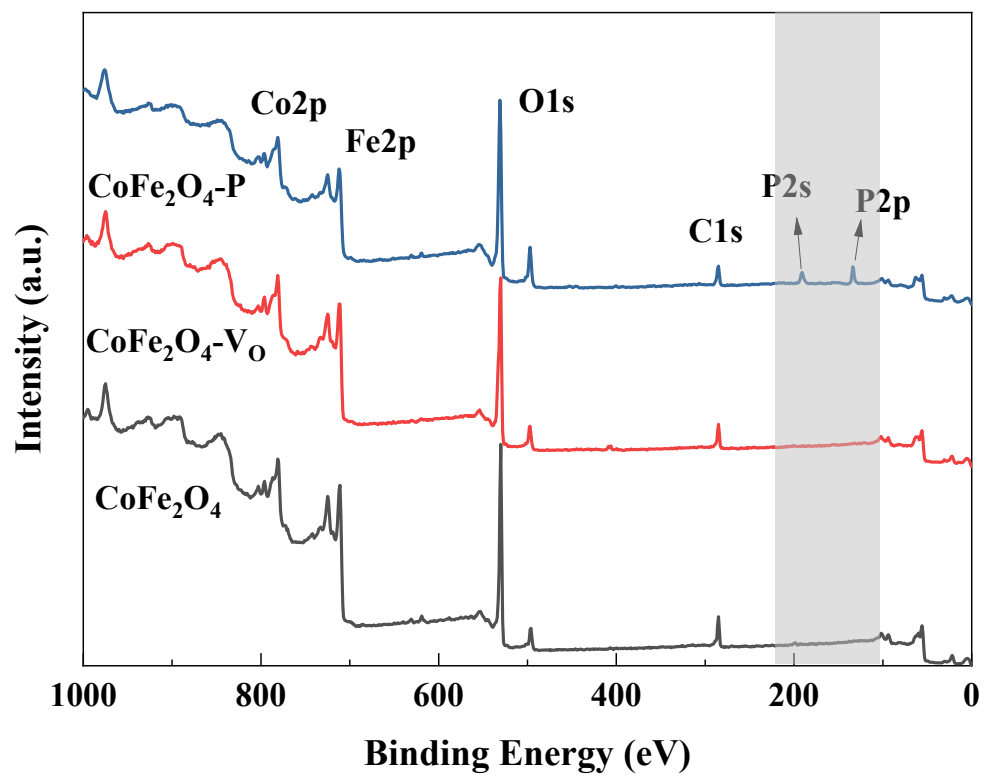

Fig. S5 XPS spectra of samples

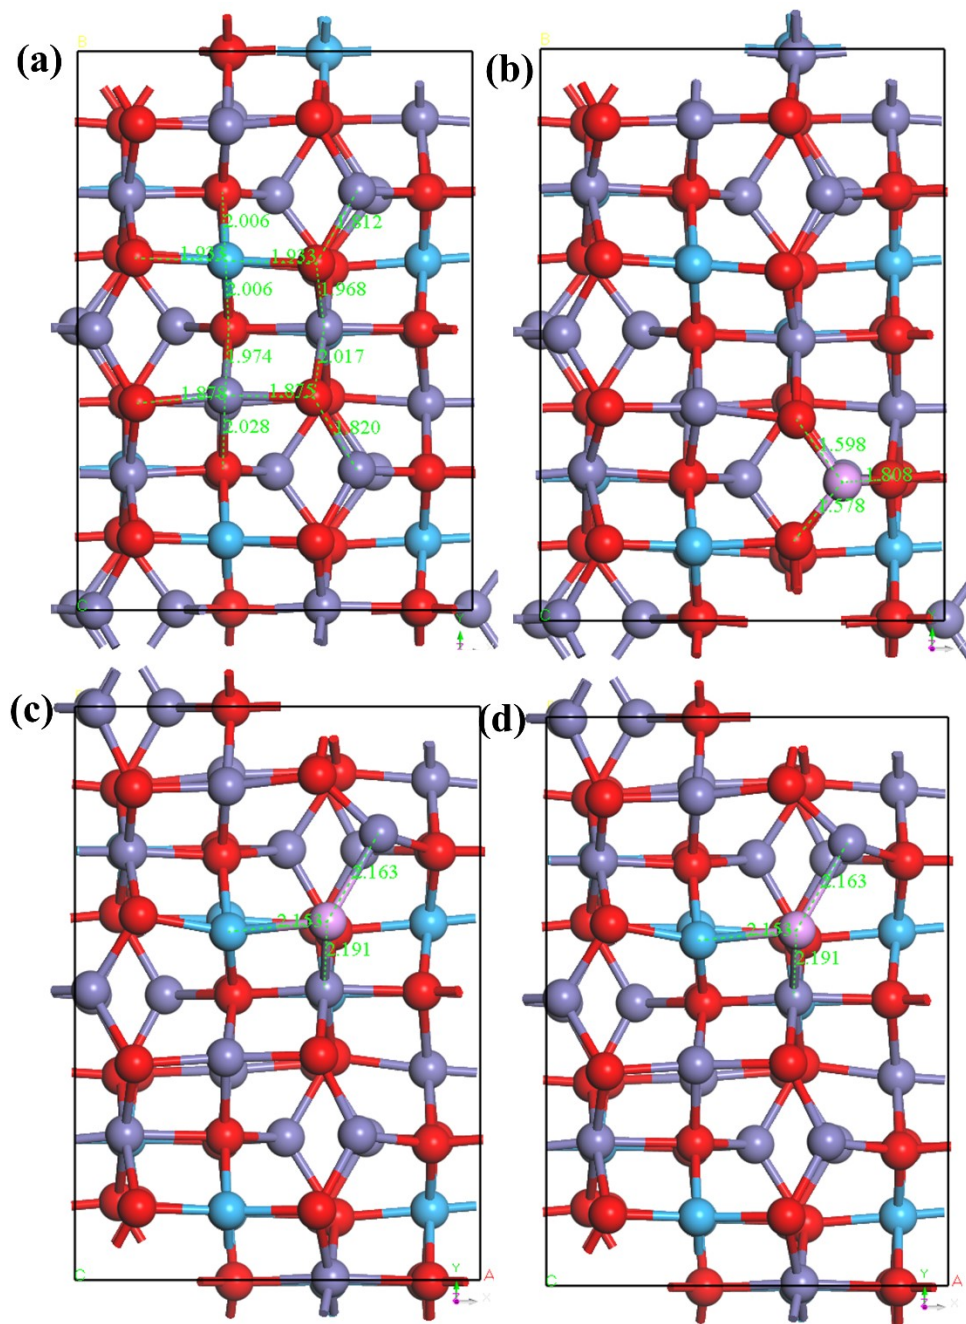

Fig. S6 Top view and bond length of  $\text{CoFe}_2\text{O}_4\text{-P}$ . (a) undoped, (b) Fe(Td), (c) O1 and (d) O2

Table S1. Doping energy of phosphorus at different sites

| site               | Co(Oh) | Fe(Oh) | Fe(Td) | O1    | O2    |
|--------------------|--------|--------|--------|-------|-------|
| Doping energy (eV) | -0.621 | -0.592 | 0.281  | 5.295 | 4.321 |

Table S2 Summary of reported OER Activity for the recent catalysts.

| Catalyst                                                           | $\eta$ at 10 mA cm <sup>-2</sup><br>(mV) | Tafel slope<br>(mV dec <sup>-1</sup> ) | Electrolyte | Ref       |
|--------------------------------------------------------------------|------------------------------------------|----------------------------------------|-------------|-----------|
| CoFe <sub>2</sub> O <sub>4</sub> -P                                | 180                                      | 65.8                                   | 1.0 M KOH   | This work |
| CaCo <sub>2</sub> O <sub>4</sub>                                   | 371                                      | 71                                     | 0.1 M KOH   | 1         |
| CoFe <sub>2</sub> O <sub>4</sub>                                   | 410                                      | 64                                     | 1 M NaOH    | 2         |
| NiFe <sub>2</sub> O <sub>4</sub>                                   | 450                                      | 80                                     | 1.0 M NaOH  | 2         |
| MnCo <sub>2</sub> O <sub>4</sub>                                   | 400                                      | 90                                     | 0.1 M KOH   | 3         |
| MnCo <sub>2</sub> O <sub>4</sub>                                   | >500                                     | 103.7                                  | 0.1 M KOH   | 4         |
| MgCo <sub>2</sub> O <sub>4</sub>                                   | 283                                      | 66                                     | 1.0 M KOH   | 5         |
| MnCo <sub>2</sub> O <sub>4</sub> /CeO <sub>2</sub>                 | 276                                      | 87                                     | 1.0 M KOH   | 6         |
| Fe <sub>0.2</sub> Ni <sub>0.8</sub> Co <sub>2</sub> O <sub>4</sub> | 270                                      | 39                                     | 1.0 M KOH   | 7         |
| NiS/NiFe <sub>2</sub> O <sub>4</sub>                               | 230                                      | 88                                     | 1.0 M KOH   | 8         |
| NiCo <sub>2-x</sub> Fe <sub>x</sub> O <sub>4</sub>                 | 274                                      | 42                                     | 1.0 M KOH   | 9         |
| MoS <sub>2</sub> /rFe-NiCo <sub>2</sub> O <sub>4</sub>             | 270                                      | 39                                     | 1.0 M NaOH  | 10        |
| MnFe <sub>2</sub> O <sub>4</sub> /NF                               | 310                                      | 65                                     | 1.0 M KOH   | 11        |
| CFO-B-MS                                                           | 208                                      | 63                                     | 1.0 M KOH   | 12        |



Table S3 The ICP results of CoFe<sub>2</sub>O<sub>4</sub>-P.

| Catalyst                            | Co/wt% | Fe/wt% | O/wt% | P/wt% |
|-------------------------------------|--------|--------|-------|-------|
| CoFe <sub>2</sub> O <sub>4</sub> -P | 39.47  | 19.02  | 18.25 | 23.27 |

## References

- 1 X. Lin, J. Zhou, D. Zheng, C. Guan, G. Xiao, N. Chen, Q. Liu, H. Bao, J.-Q. Wang, *J. Energy. Chem.* **2019**, *31*, 125–131.
- 2 C. Mahala, M. D. Sharma, M. Basu, *Electrochimica Acta* **2018**, *273*, 462–473.
- 3 W. Wang, L. Kuai, W. Cao, M. Huttula, S. Ollikkala, T. Ahopelto, A.-P. Honkanen, S. Huotari, M. Yu, B. Geng, *Angew. Chem. Int. Ed.* **2017**, *56*, 14977–14981.
- 4 M. Harada, F. Kotegawa, M. Kuwa, *ACS Appl. Energy Mater.* **2022**, *5*, 278–294.
- 5 M. Ya, J. Wang, G. Li, G. Gao, X. Zhao, J. Cui, H. Wu, L. Li, *ACS Sustainable Chem. Eng.* **2023**, *11*, 744–750.
- 6 C. Fan, X. Wu, M. Li, X. Wang, Y. Zhu, G. Fu, T. Ma, Y. Tang, *Chem. Eng. J.* **2022**, *431*, 133829.
- 7 Y. Li, X. Lin, J. Du, *Inorg. Chem.* **2021**, *60*, 19373–19380.
- 8 Z. Shao, Q. Zhu, Y. Sun, Y. Zhang, Y. Jiang, S. Deng, W. Zhang, K. Huang, S. Feng, *Adv. Mater.* **2022**, *34*, 2110172.
- 9 Y. Huang, S. L. Zhang, X. F. Lu, Z. Wu, D. Luan, X. W. (David) Lou, *Angew. Chem. Int. Ed.* **2021**, *60*, 11841–11846.
- 10 J. Li, D. Chu, H. Dong, D. R. Baker, R. Jiang, *J. Am. Chem. Soc.* **2020**, *142*, 50–54.
- 11 J. Kim, J. Lee, C. Liu, S. Pandey, S. Woo Joo, N. Son, M. Kang, *Appl. Surf. Sci.* **2021**, *546*, 149124.
- 12 J. Xie, J. Li, L. Kang, J. Li, Z. Wei, F. Lei, P. Hao, B. Tang, *ACS Sustainable Chem. Eng.* **2021**, *9*, 14596–14604.
